# Supplementary material for: Cytoplasmic Kinase Network Mediates Defense Response to Spodoptera litura in Arabidopsis
Source: MDPI journal article supplement (doi:10.3390/plants12091747), 2023-04-24
Supplement: s1 [file s1]

Table S1. Primers.

| Purpose                 | Gene/clone/plasmid       | Gene ID   | Forward primer sequence (5' to 3')                      | Reverse primer sequence (5' to 3')                       | Rmarks                                                   |
|-------------------------|--------------------------|-----------|---------------------------------------------------------|----------------------------------------------------------|----------------------------------------------------------|
| Gene cloning            | <i>PBL27</i>             | At5g18610 | CACCATGAGTGGGTGTTTGCCTTGT                               | GTCATTGTGACTATCAAAGCTGC                                  | clone into pENTR/D-TOPO                                  |
|                         | <i>CRK2</i>              | At3g19100 | <u>CCACCCACCACCA</u> CAATGGGAGGCT                       | <u>TCCAGCACTAGCTCCAGA</u> TTCGCGTTTT                     | without stop codon, Underline: S1 or T1-linker sequence  |
|                         | <i>CRK3</i>              | At2g46700 | <u>CCACCCACCACCA</u> CAATGGGGCAAT                       | <u>TCCAGCACTAGCTCCAGA</u> GCGAGGTC                       | without stop codon, Underline: S1 or T1-linker sequence  |
|                         | <i>CPK3</i>              | At4g23650 | <u>CCACCCACCACCA</u> CAATGGGCCACAGACACAGCAA             | <u>TCCAGCACTAGCTCCAGA</u> CATTCTGCGTCGGTTTGCA            | without stop codon, Underline: S1 or T1-linker sequence  |
|                         | <i>CPK13</i>             | At3g51850 | <u>CCACCCACCACCA</u> CAATGGGAACTGTTGCAGATC              | <u>TCCAGCACTAGCTCCAGA</u> TTCGTTGCCTAGGTTCAAAG           | without stop codon, Underline: S1 or T1-linker sequence  |
|                         | <i>ERF13</i>             | At2g44840 | <u>CCACCCACCACCA</u> CAATGAGCTCATCTGATTCCGT             | <u>TCCAGCACTAGCTCCAGA</u> TTATATCCGATTATCAGAAT           | include stop codon, Underline: S1 or T1-linker sequence  |
|                         | pDONRzeo_cloning_2nd PCR |           | GGGGACAAGTTTGTACAAAAAAGCAGGCTT <u>CCACCCACCACCA</u> ATG | GGGGACCACCTTTGTACAAGAAAGCTGGGTCT <u>CAGCACTAGCTCCAGA</u> | Underline: S1 or T1-linker sequence, clone into pDONRzeo |
| Promoter region cloning | <i>PDF1.2</i>            | At5g44420 | TTATAATGTCGGTTTTTCC                                     | TATTTCTTCACACAACAC                                       |                                                          |
| RT-qPCR                 | <i>PDF1.2</i>            | At5g44420 | TGTTCTCTTTGCTGCTTTCG                                    | GTTGCATGATCCATGTTTGG                                     |                                                          |
|                         | <i>ERF13</i>             | At2g44840 | GGATGTACTTCCGTAACCCGA                                   | GGCATCACGGAGAGTGTTGTA                                    |                                                          |
|                         | <i>ACT8</i>              | At1g49240 | TGCTGGTCGTGACCTTACTG                                    | CGAGGTCTCCATCTCTTGCT                                     |                                                          |

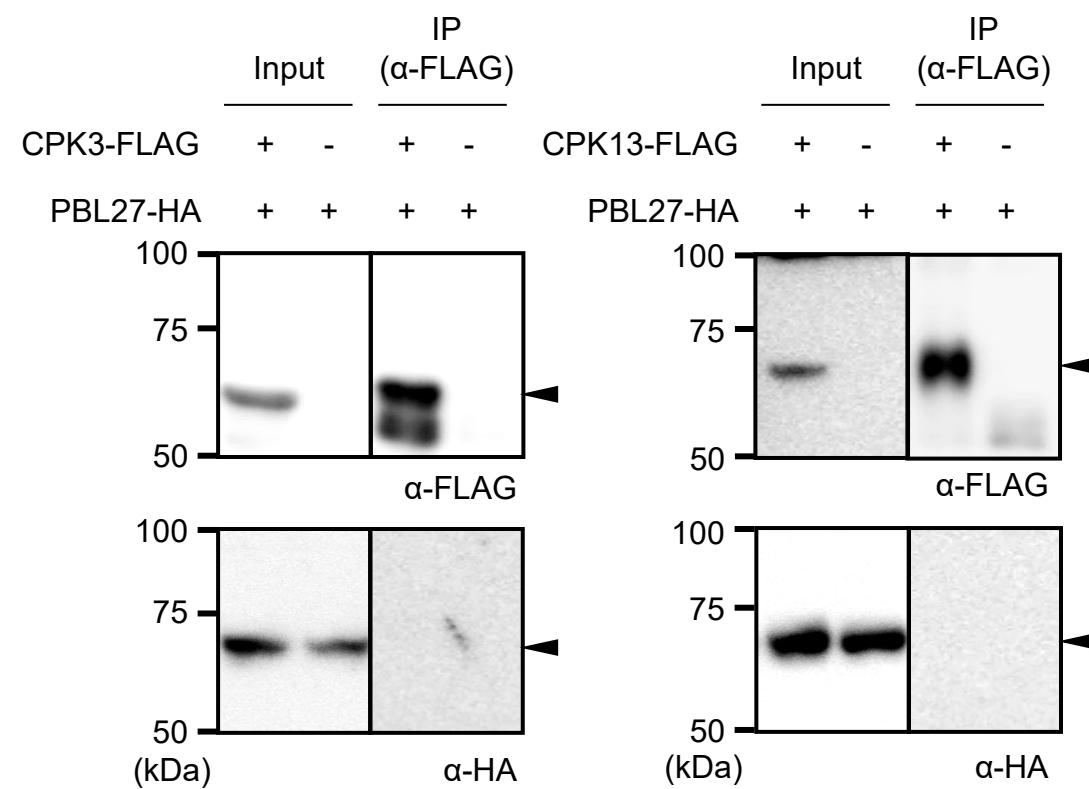

Fig. S1

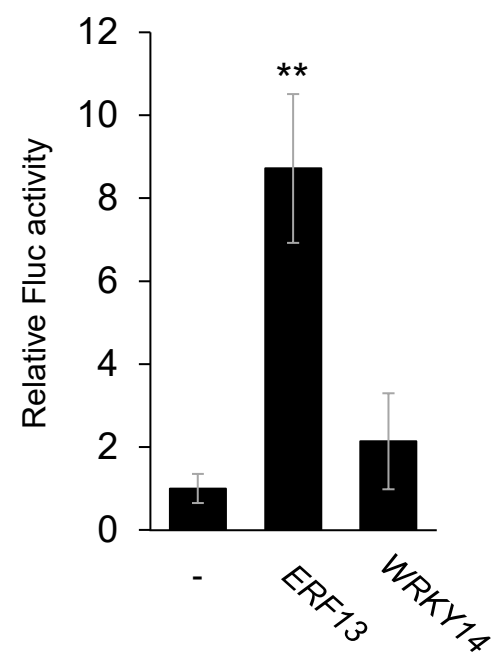

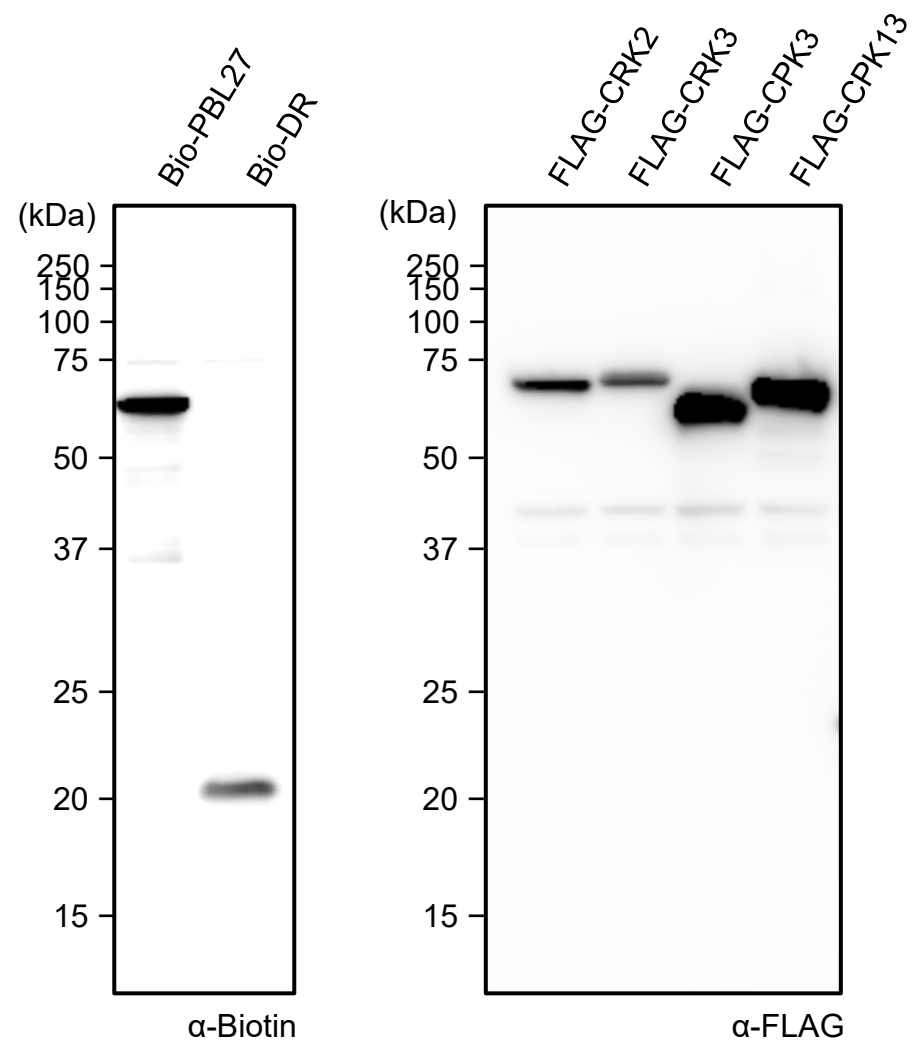

Fig. S3

**Figure S1.** Interactions of PBL27 and CPKs. A pair of FLAG-tagged CPK3 or CPK13 (CPK3-FLAG or CPK13-FLAG) and HA-tagged PBL27 (PBL27-HA) were expressed in *Nicotiana benthamiana* leaf cells. Total proteins extracted from the leaves were immunoprecipitated using anti-FLAG-tag magnetic beads, subjected to SDS-PAGE, and probed with anti-HA or anti-FLAG antibody as a primary antibody. Arrowheads indicate the predicted target signals.

**Figure S2.** Transient activation of a firefly luciferase reporter gene under the control of *PDF1.2* promoter according to coexpression with or without (-) *ERF13* or *WRKY14* in arabidopsis wild-type leaf protoplasts. Data represent the mean and standard error ( $n = 4$ ). Data marked with asterisks are significantly different from those obtained without *ERF13* or *WRKY14* (-), based on an ANOVA with Holm's sequential Bonferroni post-hoc test (\*\*,  $P < 0.01$ ).

**Figure S3.** Recombinant proteins used for AlphaScreen. Immunoblotting of proteins for biotinylated (Bio)-dihydrofolate reductase and PBL27 (Bio-DR and Bio-PBL27, respectively) as well as FLAG-tagged CRK2, CRK3, CPK3 and CPK13 (FLAG-CRK2, FLAG-CRK3, FLAG-CPK3 and FLAG-CPK13, respectively) were synthesized using a cell-free system. Total proteins were subjected to 10% SDS-polyacrylamide gel electrophoresis (SDS-PAGE) and immunoblotted with the respective antibodies ( $\alpha$ -Biotin and  $\alpha$ -FLAG).
